# Supplementary material for: A shorter symptom-onset to remdesivir treatment (SORT) interval is associated with a lower mortality in moderate-to-severe COVID-19: A real-world analysis
Source: bioRxiv or medRxiv preprint supplement (doi:10.1101/2020.11.05.20226373), 2020-11-10
Supplement: Supplementary file [file media-1.pdf]

Supplementary information

eFigure 1. Kaplan-Meier Curve

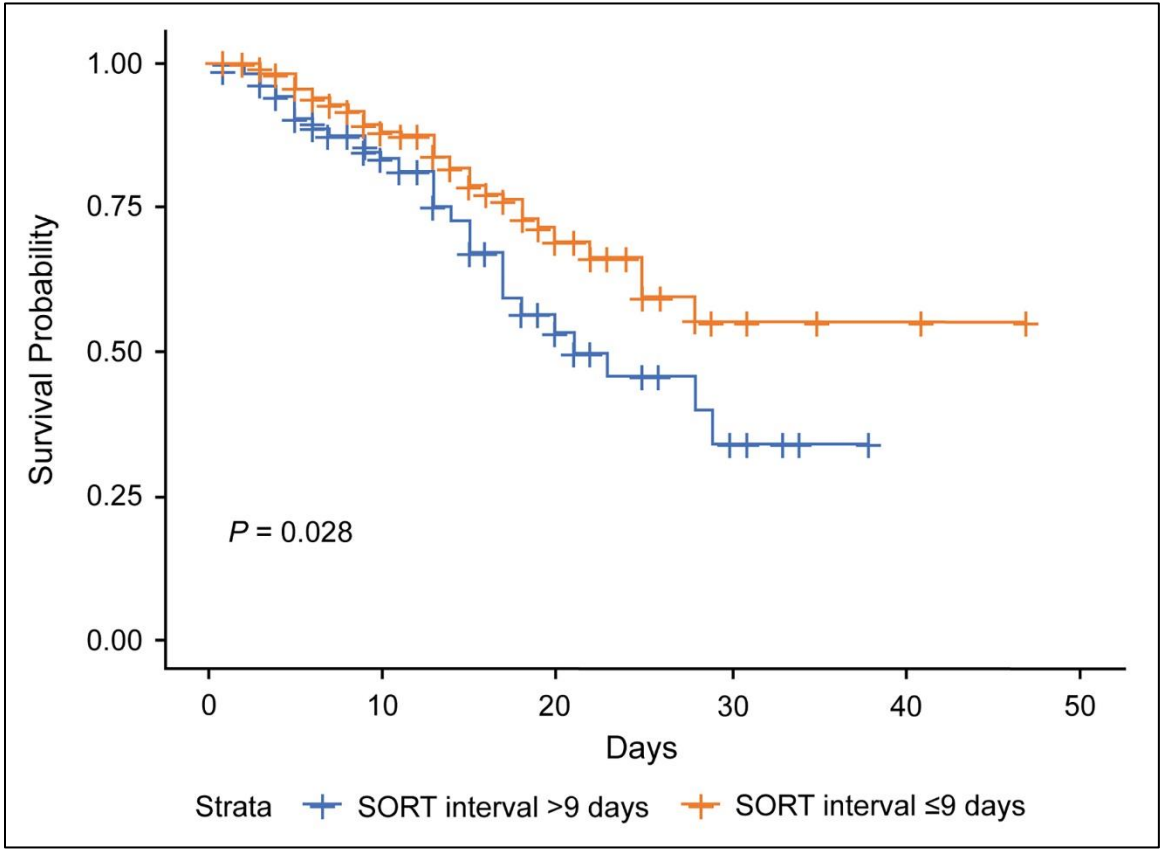

SORT, symptom onset to remdesivir treatment.
